# Supplementary material
Source: PubMed Central journal article supplement (PMC6252008)
Supplement: NIHMS996993-supplement-1.pdf [file NIHMS996993-supplement-1.pdf]

DOI: 10.1002/ ((please add manuscript number))

Article type: Full Paper

**Self-assembly of Immune Signals Improves Co-delivery to Antigen Presenting Cells and Accelerates Signal Internalization, Processing Kinetics, and Immune Activation**

**Supporting Information**

*Michelle L. Bookstaver<sup>1</sup>, Krystina L. Hess<sup>1</sup>, Christopher M. Jewell<sup>1,2,3,4,5,\*</sup>*

<sup>1</sup> Fischell Department of Bioengineering, University of Maryland, 8278 Paint Branch Drive, College Park, MD 20742

<sup>2</sup> United States Department of Veterans Affairs, VA Maryland Health Care System, 10 North Greene Street, Baltimore, Maryland 21201

<sup>3</sup> Robert E. Fischell Institute for Biomedical Devices, 8278 Paint Branch Drive, College Park, MD 20742, USA

<sup>4</sup> Department of Microbiology and Immunology, University of Maryland School of Medicine, 685 West Baltimore Street, Baltimore, MD 21201

<sup>5</sup> Marlene and Stewart Greenebaum Cancer Center, 22 South Greene Street, Baltimore, MD 21201

\* Correspondence: Professor Christopher M. Jewell  
Fischell Department of Bioengineering  
5110 A. James Clark Hall  
8278 Paint Branch Drive  
College Park, MD 20742  
Office 301-405-9628  
Email: cmjewell@umd.edu  
Web: jewell.umd.edu

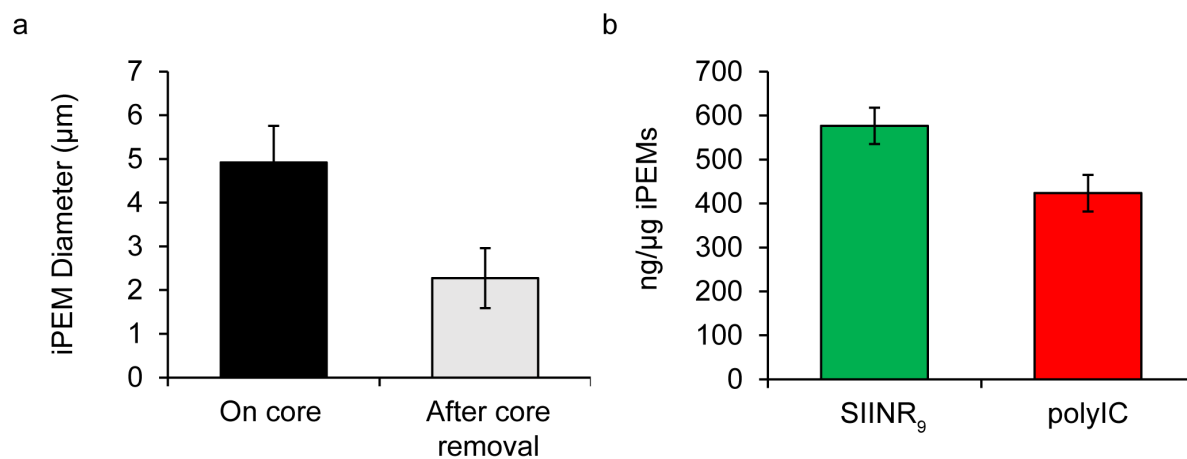

**Figure S1.** Characterization of iPEMs composed entirely of antigen and adjuvant. A) iPEM diameters before and after core removal. B) Antigen (SIINR<sub>9</sub>) and adjuvant (polyIC) composition in iPEMs after core removal. Error bars indicate standard deviation.
